# Supplementary material
Source: PubMed Central journal article supplement (PMC9260920)
Supplement: NIHMS1797359-supplement-supinfo2.pdf [file NIHMS1797359-supplement-supinfo2.pdf]

| Diet | Energy Density (kcal/gram) | Carbohydrate (% kcals) | Protein (% kcals) | Fat (% kcals) | Fiber (%)                   | Ingredients                                                                                                                                                                                                                                                                                                                                                                                                                                                                                                                                                                            |
|------|----------------------------|------------------------|-------------------|---------------|-----------------------------|----------------------------------------------------------------------------------------------------------------------------------------------------------------------------------------------------------------------------------------------------------------------------------------------------------------------------------------------------------------------------------------------------------------------------------------------------------------------------------------------------------------------------------------------------------------------------------------|
| Chow | 3.1                        | 44.2                   | 18.6              | 6.2           | 3-5 soluble, 14.7 insoluble | Ground wheat, ground corn, wheat middlings, dehulled soybean meal, corn gluten meal, soybean oil, calcium carbonate, dicalcium phosphate, brewers dried yeast, iodized salt, L-lysine, DL-methionine, choline chloride, kaolin, magnesium oxide, vitamin E acetate, menadione sodium bisulfite complex, manganous oxide, ferrous sulfate, zinc oxide, niacin, calcium pantothenate, copper sulfate, pyridoxine hydrochloride, riboflavin, thiamin mononitrate, vitamin A acetate, calcium iodate, vitamin B12 supplement, folic acid, biotin, vitamin D3 supplement, cobalt carbonate. |
| HFD  | 4.6                        | 36                     | 18                | 46            | 5.8 insoluble               | Casein, L-cysteine, corn starch, maltodextrin, sucrose, cellulose, soybean oil, lard, mineral mixture, dicalcium phosphate, calcium carbonate, potassium citrate, vitamin mixture, choline bitartrate                                                                                                                                                                                                                                                                                                                                                                                  |

**Table S1.** Macronutrient and fiber contents and ingredients of the chow diet and high fat diet (HFD).

| Pathway                                                                        | log2Fold Change | p-value     |
|--------------------------------------------------------------------------------|-----------------|-------------|
| 4-hydroxyphenylacetate degradation                                             | 2.722940251     | 0.002674464 |
| arginine, ornithine and proline interconversion                                | -1.384700294    | 6.77E-11    |
| biotin biosynthesis I                                                          | 2.03664634      | 7.39E-11    |
| catechol degradation to &beta;-keto adipate                                    | 1.976426813     | 0.041330499 |
| pyruvate fermentation to butanoate                                             | -1.019334009    | 0.00350156  |
| chlorophyllide a biosynthesis I (aerobic, light-dependent)                     | -3.015328029    | 0.00012822  |
| reductive acetyl coenzyme A pathway                                            | 1.549448186     | 0.002959629 |
| creatinine degradation I                                                       | 2.024905335     | 0.00212871  |
| nitrate reduction I (denitrification)                                          | 3.258938311     | 0.00260768  |
| glucose degradation (oxidative)                                                | 2.385286395     | 0.011254152 |
| fatty acid &beta;-oxidation I                                                  | -1.099664009    | 0.007093604 |
| superpathway of fatty acid biosynthesis initiation (E. coli)                   | 2.875459736     | 1.53E-13    |
| D-glucarate degradation I                                                      | -1.783936949    | 0.000455135 |
| superpathway of glycolysis, pyruvate dehydrogenase, TCA, and glyoxylate bypass | -1.924801132    | 0.001179148 |
| superpathway of glycerol degradation to 1,3-propanediol                        | -1.404546601    | 0.002731046 |
| L-methionine biosynthesis I                                                    | 1.555842437     | 1.10E-05    |
| L-methionine biosynthesis III                                                  | 1.747271836     | 7.93E-12    |
| lactose and galactose degradation I                                            | -3.483217437    | 7.14E-10    |
| L-leucine degradation I                                                        | 3.103418173     | 0.00598016  |
| superpathway of S-adenosyl-L-methionine biosynthesis                           | 1.386081458     | 1.72E-05    |
| NAD salvage pathway II                                                         | -1.155657983    | 0.002374661 |
| ectoine biosynthesis                                                           | 2.250635238     | 0.017661111 |
| TCA cycle IV (2-oxoglutarate decarboxylase)                                    | -2.064043204    | 0.000508278 |
| purine nucleobases degradation I (anaerobic)                                   | -1.444221374    | 1.21E-12    |
| octane oxidation                                                               | 3.032493979     | 0.007291367 |
| 3-phenylpropanoate degradation                                                 | 3.246273203     | 6.43E-05    |
| superpathway of taurine degradation                                            | 1.905628947     | 0.040937688 |
| formaldehyde assimilation I (serine pathway)                                   | 3.137366854     | 0.049175839 |
| photorespiration                                                               | 3.294765748     | 0.016560335 |
| formaldehyde assimilation II (RuMP Cycle)                                      | -1.365317593    | 0.001139863 |
| L-lysine biosynthesis II                                                       | -1.712567672    | 1.76E-10    |
| glycine betaine degradation I                                                  | 3.218897669     | 0.019723566 |
| S-methyl-5-thio-&alpha;-D-ribose 1-phosphate degradation                       | -2.237137674    | 0.010751073 |
| creatinine degradation II                                                      | 9.107201731     | 8.08E-12    |
| urea cycle                                                                     | 1.144204435     | 0.00036105  |
| biotin biosynthesis II                                                         | -2.030935198    | 3.76E-05    |
| 4-aminobutanoate degradation V                                                 | -1.157851201    | 0.013742876 |
| L-histidine degradation II                                                     | 2.69075977      | 0.003046278 |
| L-glutamate degradation VIII (to propanoate)                                   | 3.90100551      | 0.001202568 |
| toluene degradation III (aerobic) (via p-cresol)                               | -1.636149093    | 0.047095602 |
| superpathway of sulfur oxidation (Acidianus ambivalens)                        | 1.748728522     | 7.17E-05    |
| superpathway of L-methionine biosynthesis (transsulfuration)                   | 1.200467604     | 2.91E-05    |
| catechol degradation III (ortho-cleavage pathway)                              | 2.014920406     | 0.037626711 |

|                                                                                        |              |             |
|----------------------------------------------------------------------------------------|--------------|-------------|
| aromatic compounds degradation via $\beta$ -ketoacid pathway                           | 2.014920406  | 0.037626711 |
| adenosylcobalamin biosynthesis I (early cobalt insertion)                              | 3.018808213  | 0.025790622 |
| chlorophyllide a biosynthesis II (anaerobic)                                           | -3.015328029 | 0.00012822  |
| allantoin degradation to glyoxylate III                                                | -1.832305282 | 0.000309966 |
| ethylmalonyl-CoA pathway                                                               | 3.34601404   | 0.00373592  |
| 2-methylcitrate cycle II                                                               | 1.504297217  | 0.017107359 |
| superpathway of menaquinol-9 biosynthesis                                              | -1.223796802 | 0.024571513 |
| superpathway of menaquinol-6 biosynthesis I                                            | -1.293161028 | 0.019066006 |
| ubiquinol-7 biosynthesis (prokaryotic)                                                 | 1.36810042   | 0.013086171 |
| ubiquinol-9 biosynthesis (prokaryotic)                                                 | 1.36810042   | 0.013086171 |
| ubiquinol-10 biosynthesis (prokaryotic)                                                | 1.36810042   | 0.013086171 |
| superpathway of demethylmenaquinol-6 biosynthesis I                                    | -1.316131373 | 0.019066006 |
| superpathway of demethylmenaquinol-9 biosynthesis                                      | -1.245888505 | 0.024571513 |
| superpathway of menaquinol-10 biosynthesis                                             | -1.293161028 | 0.019066006 |
| superpathway of geranylgeranyldiphosphate biosynthesis I (via mevalonate)              | -4.250014114 | 3.01E-13    |
| superpathway of heme biosynthesis from glycine                                         | 1.468621901  | 0.037626711 |
| palmitate biosynthesis II (bacteria and plants)                                        | 1.366443251  | 0.000787509 |
| stearate biosynthesis II (bacteria and plants)                                         | 2.824725873  | 2.52E-13    |
| superpathway of phenylethylamine degradation                                           | -2.337473071 | 0.001202568 |
| superpathway of salicylate degradation                                                 | 1.991861057  | 0.039785754 |
| 4-methylcatechol degradation (ortho cleavage)                                          | 2.194358799  | 0.02058022  |
| superpathway of menaquinol-8 biosynthesis II                                           | 1.766596167  | 3.33E-06    |
| palmitoleate biosynthesis I (from (5Z)-dodec-5-enoate)                                 | 2.839965233  | 1.53E-13    |
| 8-amino-7-oxononanoate biosynthesis I                                                  | 2.241557343  | 2.74E-11    |
| chondroitin sulfate degradation I (bacterial)                                          | 2.407376551  | 8.78E-09    |
| superpathway of L-phenylalanine biosynthesis                                           | -1.216058261 | 0.003649799 |
| superpathway of L-tyrosine biosynthesis                                                | -1.208269537 | 0.003744832 |
| superpathway of sulfolactate degradation                                               | 3.164294449  | 0.00692912  |
| ubiquinol-8 biosynthesis (prokaryotic)                                                 | 1.36810042   | 0.013086171 |
| methylaspartate cycle                                                                  | 2.673723213  | 0.021892741 |
| glycerol degradation to butanol                                                        | -1.807175936 | 6.84E-05    |
| L-1,2-propanediol degradation                                                          | -1.004292045 | 0.014317426 |
| UDP-2,3-diacetamido-2,3-dideoxy- $\alpha$ -D-mannuronate biosynthesis                  | 1.26046917   | 0.013289115 |
| chlorophyllide a biosynthesis III (aerobic, light independent)                         | -3.015328029 | 0.00012822  |
| pyrimidine deoxyribonucleotide phosphorylation                                         | 1.012978979  | 0.000215599 |
| inosine-5-phosphate biosynthesis III                                                   | -1.399939073 | 4.73E-05    |
| myo-, chiro- and scillo-inositol degradation                                           | 1.699882168  | 0.000246312 |
| ergothioneine biosynthesis I (bacteria)                                                | 2.04725852   | 0.03566568  |
| superpathway of UDP-N-acetylglucosamine-derived O-antigen building blocks biosynthesis | 1.013985946  | 0.001945406 |
| 1,4-dihydroxy-6-naphthoate biosynthesis II                                             | 1.893429092  | 5.85E-06    |
| 1,4-dihydroxy-6-naphthoate biosynthesis I                                              | 2.553752453  | 7.22E-07    |
| taxadiene biosynthesis (engineered)                                                    | -1.24676871  | 0.003344638 |

|                                                             |              |             |
|-------------------------------------------------------------|--------------|-------------|
| L-methionine salvage cycle III                              | -2.809609141 | 0.000536568 |
| methanol oxidation to carbon dioxide                        | 3.72103984   | 7.61E-06    |
| oleate biosynthesis IV (anaerobic)                          | 2.791812448  | 1.21E-13    |
| mevalonate pathway I                                        | -4.28556232  | 3.61E-13    |
| anhydromuropeptides recycling                               | 1.746622623  | 0.000164026 |
| superpathway of heme biosynthesis from uroporphyrinogen-III | 1.554975457  | 0.00226536  |
| tRNA processing                                             | 1.37059828   | 0.037413831 |
| methylphosphonate degradation I                             | 1.632203133  | 0.002090436 |
| phenylacetate degradation I (aerobic)                       | -2.463902139 | 0.014310413 |
| allantoin degradation IV (anaerobic)                        | 2.500968789  | 0.004569686 |
| 2-methylcitrate cycle I                                     | 1.782774777  | 0.013742876 |
| (5Z)-dodec-5-enoate biosynthesis                            | 2.827637127  | 1.53E-13    |
| mycolate biosynthesis                                       | 2.77734563   | 1.21E-13    |
| formaldehyde oxidation I                                    | -1.290305426 | 0.001292646 |
| superpathway of glyoxylate bypass and TCA                   | -1.956921099 | 0.001899903 |
| superpathway of L-threonine metabolism                      | -1.910292755 | 0.041487753 |
| L-tyrosine degradation I                                    | 2.212701998  | 0.031660005 |
| superpathway of ubiquinol-8 biosynthesis (prokaryotic)      | 1.381865246  | 0.013086171 |
| L-valine degradation I                                      | 2.402497172  | 0.001832754 |

**Table S2.** Cecum microbiome functional pathways differentially regulated in HFD-fed rats compared to chow-fed rats.

| Pathway                                                                        | log2Fold Change | p-value     |
|--------------------------------------------------------------------------------|-----------------|-------------|
| 4-hydroxyphenylacetate degradation                                             | 1.640510084     | 0.016271615 |
| reductive acetyl coenzyme A pathway                                            | 1.239847462     | 0.030770187 |
| fucose degradation                                                             | 1.002479255     | 0.01462439  |
| D-galactarate degradation I                                                    | -3.124348945    | 0.036469733 |
| superpathway of D-glucarate and D-galactarate degradation                      | -3.124348945    | 0.036469733 |
| superpathway of glycol metabolism and degradation                              | 1.331005884     | 0.038133365 |
| superpathway of glycolysis, pyruvate dehydrogenase, TCA, and glyoxylate bypass | 1.690739782     | 0.017630708 |
| glyoxylate cycle                                                               | 1.613055786     | 0.020340651 |
| heme biosynthesis II (anaerobic)                                               | 1.199928772     | 0.0188208   |
| ketogluconate metabolism                                                       | 1.526470517     | 0.042829735 |
| lactose and galactose degradation I                                            | 2.074399734     | 0.003617119 |
| methanogenesis from acetate                                                    | 1.717898827     | 0.003617119 |
| TCA cycle IV (2-oxoglutarate decarboxylase)                                    | 1.520429124     | 0.026734258 |
| adenosylcobalamin biosynthesis II (late cobalt incorporation)                  | 2.456817138     | 0.019521238 |
| myo-inositol degradation I                                                     | 2.074851639     | 0.001510231 |
| formaldehyde assimilation II (RuMP Cycle)                                      | 1.014622558     | 0.032861765 |
| peptidoglycan biosynthesis II (staphylococci)                                  | 5.630046228     | 0.020340651 |
| sucrose degradation IV (sucrose phosphorylase)                                 | 1.283024969     | 0.003617119 |
| allantoin degradation to glyoxylate III                                        | 1.276639249     | 0.032203122 |
| superpathway of geranylgeranyldiphosphate biosynthesis I (via mevalonate)      | 2.035902146     | 0.006072323 |
| superpathway of phenylethylamine degradation                                   | 3.516360365     | 0.000202308 |
| norspermidine biosynthesis                                                     | 2.665631856     | 0.012125915 |
| superpathway of L-phenylalanine biosynthesis                                   | 1.050863775     | 0.019521238 |
| superpathway of L-tyrosine biosynthesis                                        | 1.044549517     | 0.019521238 |
| fatty acid salvage                                                             | 2.021690738     | 0.020340651 |
| inosine-5-phosphate biosynthesis III                                           | 1.76453324      | 3.53E-07    |
| mevalonate pathway I                                                           | 2.061169423     | 0.006145873 |
| tRNA processing                                                                | 1.979960696     | 0.009894679 |
| allantoin degradation IV (anaerobic)                                           | 2.526361723     | 0.014893373 |
| formaldehyde oxidation I                                                       | 1.003003957     | 0.030381929 |
| superpathway of glyoxylate bypass and TCA                                      | 1.86651564      | 0.014893373 |
| superpathway of L-threonine metabolism                                         | 4.586857116     | 3.53E-07    |

**Table S3.** Cecum microbiome functional pathways differentially regulated in HFD-fed rats supplemented with OFS compared to HFD-fed rats.
